# Supplementary material
Source: Springer Nature journal article supplement (https://www.springermedizin.de/resource/supplementary/12887_2014_1149_MOESM8_ESM.pdf/9476670)

### Outcome 7.1: Cerebral palsy

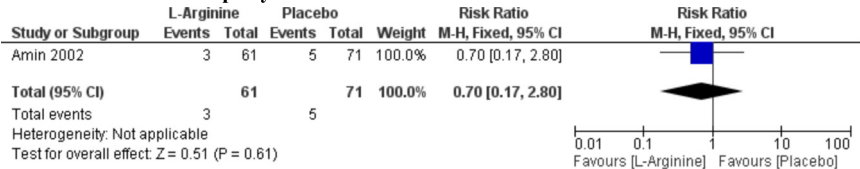

### Outcome 7.2: Cognitive delay

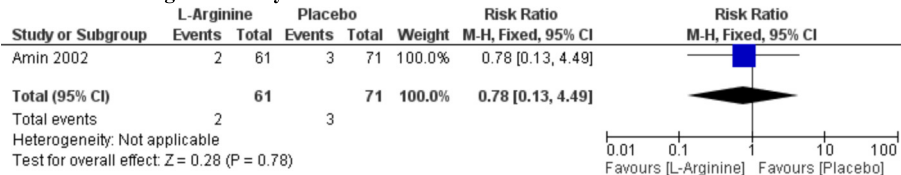

### Outcome 7.3: Blindness

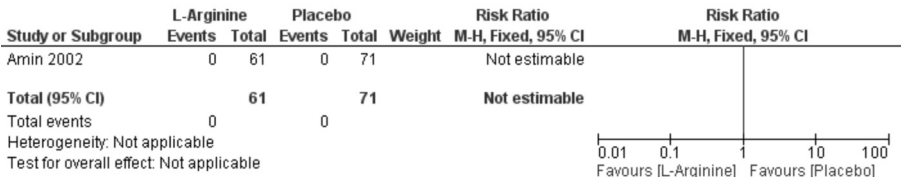

### Outcome 7.4: Deafness

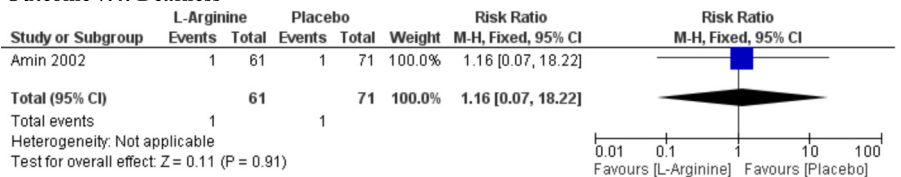

### Outcome 7.5: Any neurodevelopmental disability

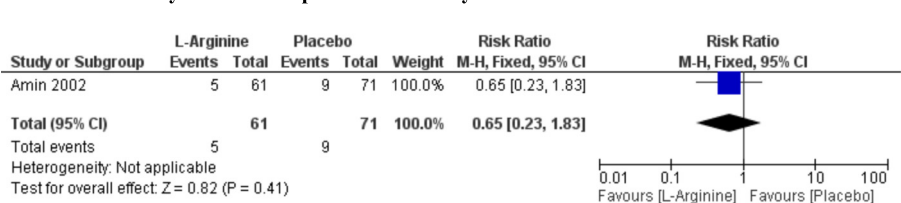

Supplement: MOESM8 [file 9476670]
